# Supplementary material for: Cost-effectiveness of a shared decision-making intervention for patients receiving treatments for cardiovascular disease and diabetes in primary care: a cluster randomised controlled trial based on real-world data (IMA-cRCT study)
Source: Research Square preprint supplement (doi:10.21203/rs.3.rs-8348455/v1), 2025-12-22
Supplement: Supplementary file 1 [file c4e51e9337adfa6cb9b911f6.docx]

**SUPPLEMENTARY METHODS**

This supplementary document outlines the methodology for cleaning data related to healthcare resource use (HCRU), sick leaves, and associated costs. Data was sourced from the SIDIAP dataset between January 1, 2021, and December 31, 2023.

**Healthcare Resource Use**

Each patient’s healthcare resource use was assessed for the year before and after the index prescription.

*Primary Care (PC)*

PC visits encompass interactions with general practitioners (GPs), paediatricians, resident physicians, nurses, midwives, PC assistants, and social workers. Additionally, psychologist visits, optometry referrals, laboratory tests, physical rehabilitation, speech therapy, and podiatry visits, which are usually provided in PC centres, were included.

Twelve percent of patients had no recorded visits with a GP during the follow-up period. To account for this, a GP visit was added to each patient’s records.

*Specialized Care (SC)*

Specialized healthcare services, including surgery, psychology, psychiatry, obstetrics and gynaecology, traumatology, oncology, dentistry, haematology, internal medicine, neurology, gastroenterology, and pulmonology, were recorded in the dataset as referrals and/or visits. The SIDIAP database records referrals and visits to SC; however, for certain services, referrals cannot be directly linked to visits. This disconnect arises because some SC services, although covered by the National Health System, are provided by entities outside the Catalan Health Institute (CHI), the main provider of the system.

To ensure data integrity and accurate representation of service utilization, discrepancies between visit and referral records were addressed as follows:

1. When both visits and referrals were recorded, only the registered visits were counted to accurately reflect actual service utilization.
2. When referrals were present without corresponding visit records, it was assumed that such visits took place in non-CHI centres or private facilities. Each referral was considered equivalent to a visit for costing purposes.
3. When visits were recorded without accompanying referrals, each visit was counted individually.

*Emergency Care*

Emergency visits were categorized based on the location, namely PC or hospitals.

*Hospital Stays*

Hospital stays were classified according to the type of centre or care received, including inpatient stays in mental health centres, day surgery, day hospital stays, stays in intermediate care facilities, intensive care unit stays, and general ward admissions. The total number of days patients were admitted during the year before and after the index date was recorded and categorized.

*Medical Tests*

The total number of medical tests per patient was calculated for the year before and after the index date.

**Costs**

Published tariffs in the Official Bulletin of Catalonia were used for costing HCRU. If the tariffs were not published for 2024, they were updated using the Consumer Price Index to 2024.

*Primary Care*

Tariffs for PC services were published in RESOLUCIÓ SLT/4326/20231.

GP and nurse visit costs varied based on location (PC centres vs. home visits) and whether the visit was scheduled or urgent. Paediatricians and resident physicians were classified under GP tariffs, while nurse and midwife visits fell under nurse tariffs.

Speech therapy tariffs were based on visit complexity, with separate rates for in-person and hybrid sessions. Since no in-person visits were recorded, the average cost of hybrid therapy across all three complexity levels was applied.

Physical rehabilitation had three separate tariffs depending on the setting: PC, hospital, or home care.

A general PC service tariff was applied to psychology, podiatry, PC assistant, and social worker visits.

The cost of optical biometry was used as a proxy for optometry visits, as it is the most frequently performed test in these cases.

Laboratory test costs included both blood extraction and analysis tariffs.

*Specialized Care*

For the costing of SC visits, two tariffs were applied—one for the initial visit and another for follow-up visits—following the tariffs published in RESOLUCIÓ SLT/4326/20231. The application of these tariffs was aligned with the data scenarios:

1. When both visits and referrals were recorded, the tariffs for first visits matched the number of referrals, and any excess visits registered beyond the referrals were costed as follow-up visits.
2. When referrals were present without corresponding visit records, these were considered first visits, and the appropriate tariff was applied.
3. When visits were recorded without accompanying referrals, if multiple visits were registered for a service, one visit was costed as a first visit and the remaining as follow-up visits.

Different tariffs were used for dentistry and obstetrics & gynaecology services provided in PC. If a referral existed without a corresponding visit record, one first visit and two follow-up visits were imputed, based on the observed pattern that, on average, patients using these services had two visits registered.

Referrals to child and adolescent care teams, including neurology and psychiatry services, were accounted for using the same approach. Likewise, visits by the community palliative care team, which include several specialists, were costed using the tariff published in ORDER SLT/63/20202 and adjusted for inflation using the CPI from March 2020 to August 2024.

*Emergency Care*

Tariffs for emergency visits varied according to severity and were published in RESOLUCIÓ SLT/4326/20231. PC urgent care centres had different tariffs depending on whether the visit included an observation stay. Hospital emergency visits were classified according to hospital triage. As our database did not include visit details, costs were allocated by calculating the average tariff for PC emergency visits and the average tariff for hospital emergency visits.

*Hospital Stays*

Tariffs were published for all types of stays except general ward admissions. Tariffs for day surgery, day hospital stays, and stays in intermediate care facilities were obtained from RESOLUCIÓ SLT/4326/20231, while tariffs for ICU stays and inpatient stays in mental health centres were sourced from ORDER SLT/63/20202. The costs for general ward admissions were calculated following ORDER SLT/63/20202, which specifies that when Diagnosis-Related Group data is unavailable, stays are priced per day, with a higher daily rate for the first 1–5 days and a lower rate from day 6 onwards. When necessary, hospital stay tariffs were adjusted for inflation using the CPI from March 2020 to August 2024.

*Medical Tests*

Medical tests were grouped into categories based on the classification provided in RESOLUCIÓ SLT/4326/20231. For each category, the average tariff across all tests within the group was calculated and applied.

Categories included X-ray, computerized tomography scan, magnetic resonance imaging, ultrasound, cytology and biopsies, cardiology tests, gastrointestinal tests, neurology tests, ophthalmology tests, respiratory tests, scintigraphy/nuclear imaging, blood extraction, bone densitometry, urology tests, polysomnography, audiometry, hysteroscopy, semenogram, human papillomavirus test, and elastography.

**Sick Leaves**

Sick leave was evaluated based on the total number of absenteeism days per patient for the year before and after the index prescription, regardless of diagnosis. Costs were estimated using the net legal minimum daily wage in Spain3 for the main analysis. Sensitivity analyses were conducted using the gross average salary in Spain4 as a reference. Since the gross average salary was published for 2022, it was adjusted for inflation using the CPI from January 2022 to August 2024.

**References**

1. Departament de Salut. RESOLUCIÓ SLT/4326/2023, de 20 de desembre, sobre la revisió de preus públics corresponents als serveis sanitaris que presta l’Institut Català de la Salut. *D Of la General Catalunya*. 2023;9067:1-199. https://portaldogc.gencat.cat/utilsEADOP/PDF/9067/2005212.pdf

2. Generalitat de Catalunya. ORDRE SLT/63/2020, de 8 de març, per la qual s’aproven els preus públics de Servei Català de la Salut. *D Of la General Catalunya*. 2020;8134:1-173. https://www.gencat.cat/dogc

3. Gobierno de España. Real Decreto 145/2024, de 6 de febrero, por el que se fija el salario mínimo interprofesional para 2024. Boletin Oficial del Estado. Published 2024. https://www.boe.es/buscar/doc.php?id=BOE-A-2020-1652

4. Instituto Nacional de Estadística. Salarios medios. Published 2022. Accessed February 5, 2024. https://www.ine.es/jaxiT3/Datos.htm?t=13926

**Supplementary table 1.** Mean healthcare resource use, sick leaves and costs based on unadjusted ITT analysis (N=3,628).

|  |  |  | ***IMA Intervention (N=2,148)*** | | ***Usual Care (N=1,481)*** | |
| --- | --- | --- | --- | --- | --- | --- |
|  |  |  | *Baseline*  *Mean(SD)* | *12-month follow-up*  *Mean(SD)* | *Baseline*  *Mean(SD)* | *12-month follow-up*  *Mean(SD)* |
| **COSTS** | | |  |  |  |  |
|  | **Healthcare costs** | | 2,261 (3,628) | 2,362 (4,157) | 2,417 (4,956) | 2,436 (4,621) |
|  |  | *Total visits* | 1,161 (1,204) | 1,122 (1,109) | 1,026 (910) | 1,019 (1,014) |
|  |  | *Medical tests* | 74 (130) | 96 (155) | 60 (118) | 80 (135) |
|  |  | *Medication* | 412 (648) | 291 (578) | 465 (706) | 301 (522) |
|  |  | *Inpatient hospitalisation* | 522 (2,390) | 765 (4,042) | 729 (3,746) | 971 (4,042) |
|  |  | *ICU* | 93 (1,363) | 88 (1,178) | 138 (1,516) | 65 (735) |
|  | **Healthcare costs + IMA interventiona** | | 2,261 (3,628) | 2,367 (4,157) | 2,417 (4,956) | 2,436 (4,621) |
|  | **Societal costs (minimum wage)** | | 2,698 (4,162) | 3,094 (5,402) | 2,838 (5,312) | 3,190 (5,402) |
|  |  | Sick leave (minimum wage) | 437 (1,831) | 732 (2,559) | 421 (1,719) | 754 (2,568) |
|  | **Societal costs (average wage)** | | 3,178 (5,442) | 3,898 (7,100) | 3,300 (6,249) | 4,018 (7,279) |
|  |  | Sick leave (average wage) | 916 (3,843) | 1,536 (5,369) | 883 (3,608) | 1,583 (5,388) |
| **HEALTHCARE RESOURCE USE** | | |  |  |  |  |
|  | Total visits | | 17.91 (15.75) | 16.69 (14.04) | 16.91 (13.88) | 16.24 (15.28) |
|  |  | Primary care visits b | 16.54 (15.01) | 14.99 (13.24) | 15.59 (12.55) | 14.70 (13.44) |
|  |  | Specialised care visits c | 0.90 (1.70) | 1.23 (1.93) | 0.77 (2.00) | 1.02 (1.83) |
|  |  | Emergency room visits d | 0.46 (1.13) | 0.46 (1.07) | 0.55 (1.41) | 0.52 (2.34) |
|  |  | Day care and specialized inpatient caree | 0.00 (0.07) | 0.00 (0.02) | 0.00 (0.04) | 0.00 (0.00) |
|  | Medical tests f | | 0.79 (1.25) | 0.98 (1.39) | 0.67 (1.19) | 0.90 (1.39) |
|  | Days on sick leave | | 11.55 (48.45) | 19.36 (67.69) | 11.13 (45.48) | 19.95 (67.93) |
|  | Days of inpatient hospitalisation | | 0.63 (3.01) | 0.93 (3.99) | 0.89 (4.77) | 1.19 (5.17) |
|  | Days in ICU | | 0.05 (0.73) | 0.05 (0.63) | 0.07 (0.82) | 0.04 (0.40) |
| a | Cost of the IMA intervention is 4.7€ | | | | | |
| b | Includes visits with GP, paediatricians, resident physicians, nurses and midwives, PC assistants, social workers, psychologist, podiatrist, optometry referrals, laboratory tests, physical rehabilitation and speech therapy. | | | | | |
| c | Surgery, psychology, psychiatry, physical rehabilitation, obstetrics and gynaecology, traumatology, oncology, dentistry, haematology, internal medicine, neurology, gastroenterology and pneumology | | | | | |
| d | Primary care and hospital emergency visists | | | | | |
| e | Day surgery, day hospital stays, inpatient stays in mental health centres and stays in intermediate care facilities | | | | | |
| f | X-ray, computerized tomography scan, magnetic resonance imaging, ultrasound, cytology and biopsies, cardiology tests, gastrointestinal tests, neurology tests, ophthalmology tests, respiratory tests, scintigraphy/nuclear imaging, blood extraction, bone densitometry, urology tests, polysomnography, audiometry, hysteroscopy, semenogram, papilloma virus test, and elastography. | | | | | |
